# Supplementary material for: Dopamine-derived cavities/Fe3O4 nanoparticles-encapsulated carbonaceous composites with self-generated three-dimensional network structure as an excellent microwave absorber
Source: Royal Society of Chemistry journal article supplement (doi:10.1039/c8ra08851a), 2019-01-01
Supplement: c8ra08851a1.pdf [file c8ra08851a1.pdf]

Supplementary information

**Dopamine-derived cavities/Fe<sub>3</sub>O<sub>4</sub> Nanoparticles Encapsulated  
Carbonaceous Composites with Self-generating Three-Dimensional  
Network Structure as an Excellent Microwave Absorber**

Lin Guo<sup>a</sup>, Sheng-Shuai Gao<sup>a</sup>, Qing-Da An<sup>a,\*</sup>, Zuo-Yi Xiao<sup>a</sup>, Shang-Ru Zhai<sup>a,\*</sup>, Dong-Jiang Yang<sup>b,\*</sup>, Li Cui<sup>a</sup>

*<sup>a</sup> Faculty of Light Industry and Chemical Engineering, Dalian Polytechnic University, Dalian 116034, P.R. China*

*<sup>b</sup> Collaborative Innovation Center for Marine Biomass Fibers Materials and Textiles of Shandong Province, School of Environmental Science and Engineering, Qingdao University, Qingdao 266071, P. R. China*

\*Corresponding authors:

E-mail: [anqingdachem@163.com](mailto:anqingdachem@163.com) (Q.-D. An); [zhairschem@163.com](mailto:zhairschem@163.com) (S.-R. Zhai);

[d.yang@qdu.edu.cn](mailto:d.yang@qdu.edu.cn) (D.-J. Yang)

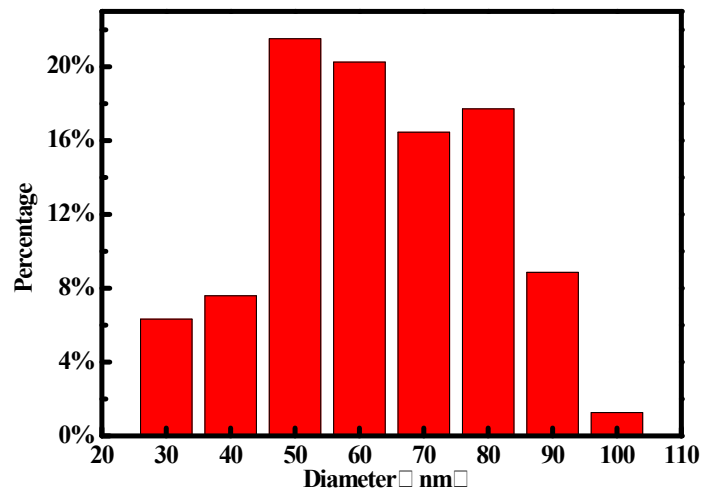

**Fig. S1** Histogram of Fe<sub>3</sub>O<sub>4</sub> nanoparticles size distribution.

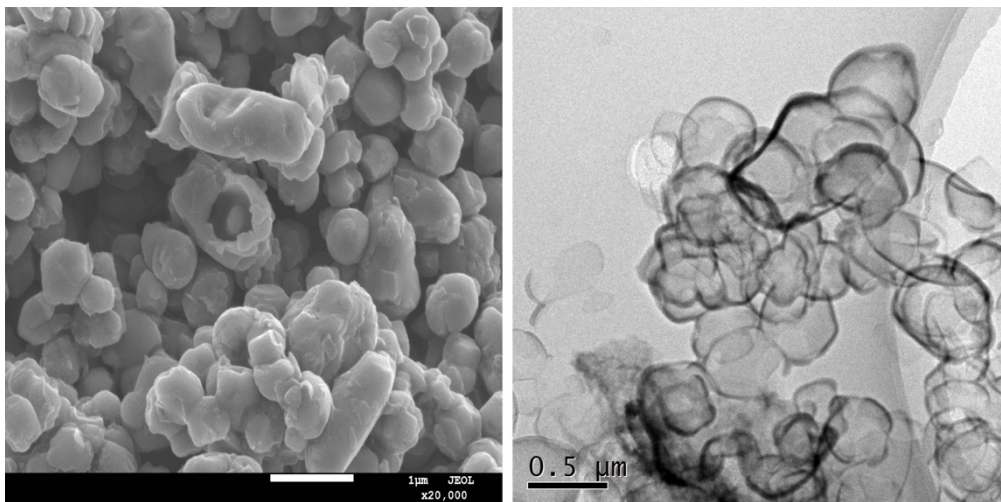

**Fig. S2** SEM and TEM images of individual HNC which was not brought into the carbonaceous matrix

**Table S1** Specific surface area ( $S_{\text{BET}}$ ), total pore volume and the most probable pore size ( $W_{\text{peak}}$ ) of samples

| Sample  | $S_{\text{BET}}$ ( $\text{m}^2 \cdot \text{g}^{-1}$ )<br>1) | Total pore volume ( $\text{cm}^3 \cdot \text{g}^{-1}$ )<br>1) | $W_{\text{peak}}$<br>(nm) |
|---------|-------------------------------------------------------------|---------------------------------------------------------------|---------------------------|
| FC-700  | 220                                                         | 0.31                                                          | 4.3                       |
| HFC-700 | 195                                                         | 0.34                                                          | 5.3                       |
| HFC-800 | 628                                                         | 0.87                                                          | 3.5                       |
| HFC-900 | 241                                                         | 0.29                                                          | 3.1                       |

**Table S2** Saturation magnetization ( $M_S$ ), coercivity ( $H_C$ ) and remanent magnetization ( $M_r$ ) of FC-700, HFC-700, HFC-800 and HFC-900.

| Sample  | $M_S$ ( $\text{emu} \cdot \text{g}^{-1}$ ) | $H_C$ (Oe) | $M_r$ ( $\text{emu} \cdot \text{g}^{-1}$ ) |
|---------|--------------------------------------------|------------|--------------------------------------------|
| FC-700  | 9.92                                       | 149.85     | 1.31                                       |
| HFC-700 | 10.00                                      | 149.99     | 1.31                                       |
| HFC-800 | 1.58                                       | 149.90     | 0.09                                       |
| HFC-900 | 19.01                                      | 29.94      | 0.30                                       |
